# Supplementary material
Source: MDPI journal article supplement (https://www.mdpi.com/1424-2818/15/4/571)
Supplement: s1 [file s1]

# Detection of a diverse endophyte assemblage within fungal communities associated with the Arundo leaf miner, *Lasioptera donacis* (Diptera: Cecidomyiidae)

Marie-Claude Bon<sup>1, \*</sup>, John A. Goolsby<sup>2</sup>, Guy Mercadier<sup>1,3</sup>, Fatiha Guermache<sup>1</sup>, Javid Kashefi<sup>1</sup>, Massimo Cristofaro<sup>4</sup>, Ann T. Vacek<sup>5,3</sup> and Alan Kirk<sup>1,3</sup>

**Table S1.** Collection sites and dates, name of the collector, and abbreviation for the fungus isolates recovered in each site. In bold are the fungus isolates recovered from ovarioles and ovipositors of *L. donacis*.

| Collection site /<br>Country | Collection date/<br>Collector name                      | Abbeivation for<br>fungus isolate |
|------------------------------|---------------------------------------------------------|-----------------------------------|
| Antequerra/Spain             | 10/11/2011/Guy Mercadier                                | Ante 1, Ante 2                    |
| Badajoz/Spain                | 09/11/2011/Guy Mercadier                                | Bada 1, Bada 2                    |
| Bonarès/Spain                | 10/11/2011/Guy Mercadier                                | Bona 1                            |
| La Bernadilla/Spain          | 11/11/2011/Guy Mercadier                                | Bern 1, Bern 2                    |
| Medellin/Spain               | 08/11/2011/Guy Mercadier                                | Med 1, Med 2                      |
| Muro de Alcoy/Spain          | 15/11/2011/Guy Mercadier                                | Muro 1                            |
| Vilobi/Spain                 | 26/09/2011/Guy Mercadier                                | Vil 1 to Vil 5                    |
| Tortosa/Spain                | 26/09/2011/Guy Mercadier                                | Tort 4 to Tort 6                  |
| Camprils/Spain               | 27/09/2011/Guy Mercadier                                | Camp 1, Camp 2                    |
| Girona/Spain                 | 16/11/2011/Guy Mercadier                                | Giro 3 to Giro 5                  |
| Huétor Tajar/Spain           | 10/11/2011/Guy Mercadier                                | Huet 1 to Huet 3                  |
| Jete/Spain                   | 11/11/2011/Guy Mercadier                                | Jetp 1 to Jetp 4                  |
|                              | 03/05/2012 John Goolsby                                 | Tjet 1 to Tjet 3                  |
| Villanueva/Spain             | 08/11/2011/Guy Mercadier                                | Villa 1                           |
| San Juan del Puerto/Spain    | 09/11/2011/Guy Mercadier                                | San 2, San 3                      |
| La Puebla de Cazalla/Spain   | 10/11/2011/Guy Mercadier                                | Pueb 1                            |
| Adra Zapata/Spain            | 11/11/2011/Guy Mercadier                                | Adra 1, Adra 2                    |
| Village Catalan/France       | 16/11/2011/Guy Mercadier                                | Cat 1                             |
| Assas/France                 | 13/10/2011& 22/10/2013/Guy Mercadier & Fatiha Guermache | Ass1, Ass3; BMWL, BMBL            |
| Restinclières/France         | 19/10/2011/Guy Mercadier                                | Rest 1 to Rest 4                  |
| Baillarguet/France           | 13/10/2011/Guy Mercadier                                | Bail 3, Bail 5, Bail 6            |
| Prades le Lez/France         | 15/10/2012/Alan kirk                                    | <b>Ovi1 to Ovi3, Egg1 to Egg3</b> |
| Ireapetra/Crete              | 22/06/2012/Alan Kirk                                    | <b>Ire 1, Ire 2 to Ire 3</b>      |
| Agia Triada/Greece           | 14/07/2013/Javid Kashefi & Marie Claude Bon             | Agia 1 to Agia 10                 |
| Fiumedinisi/Sicily           | 17/06/2012/Alan Kirk                                    | Fiu 1                             |
| Laredo LCC/Texas USA         | 29/08/2012/John Goolsby                                 | Lar 1 to Lar 3                    |
| Del Rio/Texas USA            | 29/08/2012/ John Goolsby                                | Rio 1 to Rio 5                    |
| Pond MAB/Texas USA           | 29/08/2012/John Goolsby                                 | Pond 1 to Pond 4                  |

|                          |                         |                |
|--------------------------|-------------------------|----------------|
| Moore Air Base/Texas USA | 29/08/2012/John Goolsby | Moo 1 to Moo 3 |
| Quemado/Texas USA        | 29/08/2012/John Goolsby | Que 1 to Que 4 |

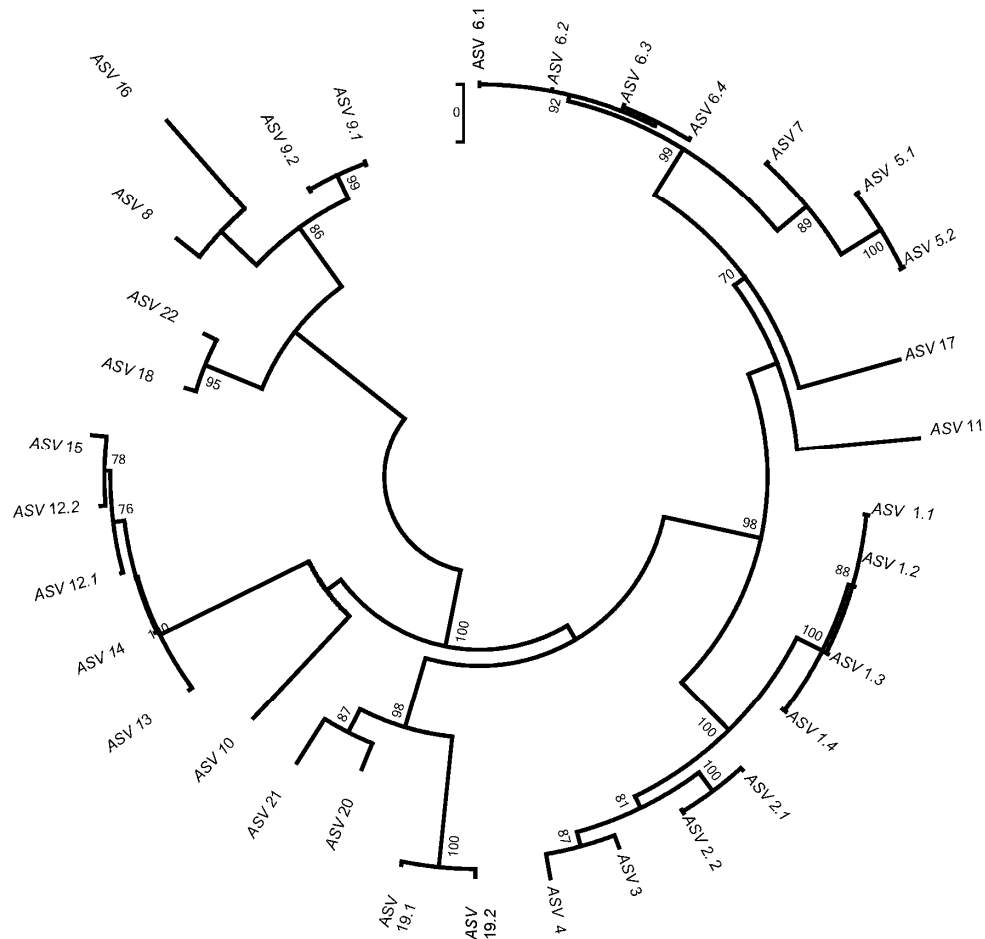

**Figure S1.** Circular phylogenetic tree inferred from maximum likelihood (ML) using ITS Amplicon variant sequences (ASVs) depicting the within and between MOTUs diversity of the endophytes recovered from fungal communities associated with *Lasioptera donacis* and leaf sheath of giant reed. The first number after the ASV code corresponds to the MOTU number. ML values greater than 70% are indicated near the nodes.

**Table S2.** List of the MOTUs evidenced in the study with taxonomic code assignment provided by UNITE database and associated strains. In bold are the strains recovered from ovarioles and ovipositors of *L. donacis*.

| MOTU number /<br>Reference UNITE fungal Species Hypothesis (SH) | Fungal strain                                                                                                                 |
|-----------------------------------------------------------------|-------------------------------------------------------------------------------------------------------------------------------|
| MOTU1/ SH1541923.08FU                                           | Ante1, Ass3, Bada2, Bona1, Ire2, Bern1, Med2, Muro1, Rest2, Rest4, Vil2, Vil5, Agia1, Agia2, Agia4, Agia5, Tjet1, Tjet3, Lar1 |
| MOTU2/ SH1541921.08FU                                           | Bail6, Bern2                                                                                                                  |
| MOTU3/ SH1541924.08FU                                           | Rio 3, 4, 5                                                                                                                   |
| MOTU4/SH1541928.08FU                                            | Pond1, Lar2                                                                                                                   |
| MOTU5/SH1567483.08FU                                            | Ass1, Bada1, Bail5, Ire3, Rest3, Tort6, Villa1                                                                                |

|                        |                                                                                                                                       |
|------------------------|---------------------------------------------------------------------------------------------------------------------------------------|
| MOTU6/ SH1610159.08FU  | Camp2, Fiu1, Giro3, Giro5, Huet1, Huet3, Jetp1, Jetp3, Vil1, Vil3, Agia7, Agia8, Agia9, Agia10, BMWL, BMBL, Rio1, Pond2, <b>Ire11</b> |
| MOTU7/ SH1610157.08FU  | Moo2                                                                                                                                  |
| MOTU8/ SH1505921.08FU  | Huet2                                                                                                                                 |
| MOTU9/ SH1526398.08FU  | Que1, Que2, Pond3, Pond4                                                                                                              |
| MOTU10/ SH1507367.08FU | Bail3, San2, Tort4, Agia6                                                                                                             |
| MOTU11/ SH1615599.08FU | Rest1                                                                                                                                 |
| MOTU12/ SH1572816.08FU | Pueb1, Lar3                                                                                                                           |
| MOTU13/ SH1572792.08FU | Giro4, Tjet2                                                                                                                          |
| MOTU14/ SH1572792.08FU | Vil4                                                                                                                                  |
| MOTU15/ SH1572820.08FU | Agia3                                                                                                                                 |
| MOTU16/ SH1526406.08FU | Moo1, Que3                                                                                                                            |
| MOTU17/ SH1524421.08FU | Adra1, Adra2                                                                                                                          |
| MOTU18/ SH1547057.08FU | Moo3                                                                                                                                  |
| MOTU19/ SH1516144.08FU | Ante2, Jetp4, Jetp2, San1, San3, Cat, Rio2                                                                                            |
| MOTU20/ SH1529984.08FU | Camp1, Med1                                                                                                                           |
| MOTU21/ SH1530001.08FU | Tort5                                                                                                                                 |
| MOTU22/ SH1547057.08FU | Que 4                                                                                                                                 |
| MOTU23/ SH1540045.08FU | <b>Egg1 to Egg 2, ovi1 to ovi3</b><br><b>Egg 3</b>                                                                                    |
